# Supplementary material for: Enzobiotics—A Novel Therapy for the Elimination of Uremic Toxins in Patients with CKD (EETOX Study): A Multicenter Double-Blind Randomized Controlled Trial
Source: Nutrients. 2022 Sep 15;14(18):3804. doi: 10.3390/nu14183804 (PMC9503043; doi:10.3390/nu14183804)
Supplement: Supplementary file 1 [file nutrients-14-03804-s001.zip]

Archive with 4 entries (4 files):
- Supplement S1. Nutrients.pdf
- Supplement S2. Nutrients.pdf
- Supplement S3. Nutrients.pdf
- Supplement S4. Nutrients.pdf
