# Supplementary material for: Enzobiotics—A Novel Therapy for the Elimination of Uremic Toxins in Patients with CKD (EETOX Study): A Multicenter Double-Blind Randomized Controlled Trial
Source: Nutrients. 2022 Sep 15;14(18):3804. doi: 10.3390/nu14183804 (PMC9503043; doi:10.3390/nu14183804)
Supplement: Supplementary file 1 [file nutrients-14-03804-s001.zip › Supplement S4. Nutrients.pdf]

**Supplement 4****Table S2 : External data validation in N=585 Creatinine on Platelet Counts and Uric Acid according to age and Gender**

| Patient Code     | Gender | Age | Request Date | Creatinine Value | GFR   | CKD _Classes | Uric Acid Value | Platelet Count Value |
|------------------|--------|-----|--------------|------------------|-------|--------------|-----------------|----------------------|
| 201907170015     | Male   | 58  | 24-07-2019   | 4.39             | 14.8  | 5            | 1.2             | 175000               |
| 201811090071     | Male   | 55  | 9/11/2018    | 3.43             | 19.9  | 4            | 1.4             | 155000               |
| 201804170048     | Male   | 49  | 3/5/2018     | 10.23            | 5.8   | 5            | 1.5             | 218000               |
| 200907060071     | Female | 21  | 2/3/2018     | 0.64             | 124.7 | 1            | 1.5             | 261000               |
| 201906050004     | Male   | 56  | 5/6/2019     | 0.61             | 145.6 | 1            | 1.5             | 241000               |
| 201810020102     | Male   | 52  | 2/10/2018    | 1.3              | 61.7  | 2            | 2               | 159000               |
| 201909040117     | Female | 45  | 4/9/2019     | 0.39             | 189.2 | 1            | 2.2             | 601000               |
| 201810080031     | Male   | 55  | 8/10/2018    | 2.89             | 24.3  | 4            | 2.5             | 248000               |
| 201809240066     | Male   | 41  | 1/10/2018    | 7.98             | 8     | 5            | 2.6             | 180000               |
| 201801260053     | Male   | 28  | 30-01-2018   | 4.81             | 15.5  | 4            | 2.6             | 251000               |
| 201912060035     | Male   | 42  | 6/12/2019    | 11.19            | 5.4   | 5            | 2.7             | 365000               |
| 201809280041     | Male   | 60  | 15-10-2018   | 5.7              | 10.9  | 5            | 2.7             | 152000               |
| 200612180129     | Female | 68  | 29-07-2019   | 1.8              | 29.8  | 4            | 2.7             | 256000               |
| KGH-201512290069 | Female | 50  | 8/4/2019     | 0.58             | 117.1 | 1            | 2.7             | 215000               |
| 201807200038     | Female | 37  | 20-07-2018   | 0.53             | 138.2 | 1            | 2.7             | 399000               |
| 201902080090     | Male   | 50  | 8/2/2019     | 6.29             | 10.1  | 5            | 2.8             | 157000               |
| 201809270127     | Male   | 47  | 29-11-2019   | 2.77             | 26.3  | 4            | 2.8             | 155000               |
| 201803220004     | Female | 58  | 22-03-2018   | 6.81             | 6.6   | 5            | 2.9             | 237000               |
| 201802090039     | Male   | 57  | 15-06-2019   | 3.07             | 22.5  | 4            | 2.9             | 181000               |
| 201802100050     | Female | 82  | 10/2/2018    | 1.29             | 42.1  | 3            | 3               | 233000               |
| 200105080089     | Male   | 73  | 6/9/2018     | 1.39             | 53.3  | 3            | 3               | 291000               |
| 201902250031     | Female | 59  | 25-02-2019   | 0.92             | 66.5  | 2            | 3               | 371000               |
| 201402090004     | Female | 39  | 2/4/2019     | 0.8              | 85    | 2            | 3               | 221000               |
| 201808130043     | Female | 27  | 13-08-2018   | 0.52             | 150.6 | 1            | 3               | 414000               |
| 201812170005     | Female | 39  | 17-12-2018   | 0.44             | 169.5 | 1            | 3               | 15000                |
| 201801100052     | Male   | 50  | 10/1/2018    | 0.78             | 112.2 | 1            | 3.1             | 397000               |
| 201801260053     | Male   | 29  | 5/4/2019     | 5.5              | 13.2  | 5            | 3.2             | 222000               |
| 201809080086     | Female | 39  | 21-09-2018   | 3.74             | 14.3  | 5            | 3.2             | 165000               |
| 201905270023     | Female | 49  | 27-05-2019   | 0.47             | 149.9 | 1            | 3.2             | 280000               |
| 201903180059     | Male   | 71  | 18-03-2019   | 5.57             | 10.8  | 5            | 3.3             | 245000               |
| 201812040032     | Male   | 58  | 4/12/2018    | 4.59             | 14.1  | 5            | 3.3             | 211000               |
| 201901020039     | Female | 33  | 2/4/2019     | 2.11             | 28.7  | 4            | 3.3             | 161000               |
| 201901210039     | Male   | 33  | 21-01-2019   | 0.78             | 122   | 1            | 3.3             | 331000               |
| 201812140048     | Male   | 67  | 14-12-2018   | 0.6              | 143.1 | 1            | 3.3             | 121000               |
| 201805160006     | Male   | 36  | 16-05-2018   | 8.96             | 7.2   | 5            | 3.4             | 209000               |
| 201802210043     | Female | 59  | 27-03-2018   | 4.15             | 11.7  | 5            | 3.4             | 208000               |
| 201411110063     | Female | 81  | 8/10/2019    | 1.72             | 30.3  | 3            | 3.4             | 246000               |

|                      |        |    |            |       |       |   |     |        |
|----------------------|--------|----|------------|-------|-------|---|-----|--------|
| 201906120017         | Male   | 53 | 27-06-2019 | 5.22  | 12.4  | 5 | 3.5 | 343000 |
| 201902140055         | Male   | 58 | 14-02-2019 | 4.78  | 13.4  | 5 | 3.5 | 240000 |
| 200212310099         | Male   | 77 | 28-03-2019 | 3.57  | 17.8  | 4 | 3.5 | 162000 |
| 201311300035         | Female | 55 | 19-02-2018 | 1.14  | 52.7  | 3 | 3.5 | 286000 |
| 201802220023         | Male   | 56 | 22-02-2018 | 1.29  | 61.3  | 2 | 3.5 | 179000 |
| 200711200031         | Male   | 35 | 26-04-2018 | 9.64  | 6.6   | 5 | 3.6 | 317000 |
| 201803190034         | Male   | 40 | 13-05-2019 | 9.01  | 7     | 5 | 3.6 | 328000 |
| 201806190108         | Male   | 52 | 19-06-2018 | 7.56  | 8.1   | 5 | 3.6 | 180000 |
| 201806210063         | Male   | 38 | 4/10/2018  | 6.85  | 9.7   | 5 | 3.6 | 181000 |
| 201812050114         | Male   | 32 | 5/12/2018  | 5.32  | 13.4  | 5 | 3.6 | 229000 |
| 201802220055         | Female | 41 | 22-02-2018 | 0.6   | 117.3 | 1 | 3.6 | 245000 |
| 201903080047         | Female | 29 | 12/4/2019  | 5.64  | 9.5   | 5 | 3.7 | 220000 |
| 201908020136         | Male   | 70 | 14-11-2019 | 6.24  | 9.5   | 5 | 3.7 | 169000 |
| 201811260076         | Male   | 30 | 28-11-2018 | 7.1   | 9.7   | 5 | 3.7 | 461000 |
| 201708040092         | Male   | 43 | 24-01-2018 | 6.07  | 10.8  | 5 | 3.7 | 210000 |
| 201109210124         | Female | 39 | 17-04-2019 | 4.62  | 11.2  | 5 | 3.7 | 341000 |
| 201806210027         | Female | 49 | 9/8/2018   | 0.59  | 115.3 | 1 | 3.7 | 418000 |
| 201904090034         | Male   | 24 | 29-08-2019 | 5.75  | 13    | 5 | 3.8 | 268000 |
| 201902280108         | Male   | 72 | 14-03-2019 | 3.92  | 16.2  | 4 | 3.8 | 268000 |
| 201905110038         | Female | 62 | 11/5/2019  | 1.38  | 41.2  | 3 | 3.8 | 387000 |
| 201803150047         | Male   | 75 | 15-03-2018 | 1.48  | 49.3  | 3 | 3.8 | 225000 |
| 200908200041         | Female | 25 | 18-07-2019 | 1.3   | 53.1  | 3 | 3.8 | 197000 |
| 201812050075         | Male   | 53 | 11/12/2018 | 6.48  | 9.6   | 5 | 3.9 | 174000 |
| 201802140106         | Female | 53 | 14-02-2018 | 4.44  | 11.1  | 5 | 3.9 | 225000 |
| 201401270069         | Male   | 42 | 3/1/2019   | 5.41  | 12.4  | 5 | 3.9 | 159000 |
| 201704270046         | Female | 62 | 3/4/2018   | 0.91  | 66.7  | 2 | 3.9 | 289000 |
| 201909120049         | Male   | 60 | 12/9/2019  | 1.17  | 67.7  | 2 | 3.9 | 188000 |
| 201812310110         | Female | 53 | 1/1/2019   | 0.67  | 98    | 1 | 3.9 | 204000 |
| 201907290063         | Male   | 69 | 29-07-2019 | 0.71  | 117.1 | 1 | 3.9 | 434000 |
| KGH-<br>201502270153 | Male   | 67 | 18-11-2019 | 4.11  | 15.5  | 4 | 4   | 367000 |
| 201805290054         | Male   | 41 | 29-05-2018 | 2.1   | 37.2  | 3 | 4   | 254000 |
| 201908220032         | Female | 55 | 22-08-2019 | 0.55  | 122.2 | 1 | 4   | 320000 |
| 201405130026         | Female | 40 | 30-11-2019 | 0.51  | 142.2 | 1 | 4   | 380000 |
| 201807250025         | Male   | 44 | 14-11-2018 | 7.33  | 8.7   | 5 | 4.1 | 183000 |
| 201910070040         | Female | 54 | 7/10/2019  | 5.34  | 8.9   | 5 | 4.1 | 258000 |
| 201812030078         | Male   | 50 | 19-10-2019 | 6.92  | 9     | 5 | 4.1 | 161000 |
| 201903070064         | Female | 53 | 7/3/2019   | 0.58  | 115.8 | 1 | 4.1 | 280000 |
| 201909190131         | Male   | 31 | 10/10/2019 | 12.38 | 5.1   | 5 | 4.2 | 205000 |
| 201809070036         | Male   | 33 | 6/3/2019   | 8.68  | 7.6   | 5 | 4.2 | 190000 |
| 201707170228         | Male   | 56 | 21-03-2018 | 6.19  | 10    | 5 | 4.2 | 303000 |
| 200806110173         | Female | 56 | 21-06-2018 | 4.21  | 11.6  | 5 | 4.2 | 174000 |
| 201807180004         | Male   | 49 | 20-11-2018 | 5.15  | 12.8  | 5 | 4.2 | 199000 |
| 201804180051         | Female | 23 | 16-05-2018 | 0.55  | 145.8 | 1 | 4.2 | 240000 |
| 201901090058         | Male   | 66 | 30-01-2019 | 7.87  | 7.4   | 5 | 4.3 | 258000 |

|                  |        |    |            |       |       |   |     |        |
|------------------|--------|----|------------|-------|-------|---|-----|--------|
| 201903140019     | Female | 42 | 14-03-2019 | 4.96  | 10.2  | 5 | 4.3 | 189000 |
| 201910020070     | Male   | 73 | 2/10/2019  | 1.4   | 52.9  | 3 | 4.3 | 235000 |
| 201904290113     | Female | 51 | 29-04-2019 | 0.75  | 86.7  | 2 | 4.3 | 337000 |
| 200507060068     | Female | 48 | 5/8/2019   | 0.72  | 92    | 1 | 4.3 | 249000 |
| 201305140007     | Male   | 64 | 30-10-2018 | 0.87  | 94    | 1 | 4.3 | 278000 |
| 201911140138     | Male   | 48 | 15-11-2019 | 0.84  | 103.8 | 1 | 4.3 | 231000 |
| 201605240023     | Male   | 34 | 29-04-2019 | 0.83  | 112.9 | 1 | 4.3 | 261000 |
| 201901110010     | Female | 56 | 11/1/2019  | 0.56  | 119.2 | 1 | 4.3 | 378000 |
| 201801170121     | Female | 37 | 18-01-2018 | 0.55  | 132.4 | 1 | 4.3 | 308000 |
| 201811030017     | Male   | 47 | 7/11/2018  | 0.51  | 185.5 | 1 | 4.3 | 525000 |
| 201901090138     | Male   | 58 | 9/1/2019   | 6.97  | 8.7   | 5 | 4.4 | 257000 |
| 201612190086     | Female | 59 | 10/8/2018  | 4.83  | 9.8   | 5 | 4.4 | 195000 |
| 201807100007     | Male   | 56 | 19-07-2018 | 5.72  | 11    | 5 | 4.4 | 275000 |
| 201809250020     | Male   | 56 | 25-09-2018 | 5.01  | 12.8  | 5 | 4.4 | 246000 |
| 200505110075     | Female | 53 | 12/6/2018  | 2.35  | 23    | 4 | 4.4 | 259000 |
| 201203080074     | Male   | 66 | 10/4/2019  | 2.7   | 25.3  | 4 | 4.4 | 223000 |
| KGH-201503050099 | Female | 36 | 26-01-2019 | 0.47  | 159.6 | 1 | 4.4 | 105000 |
| 201807090028     | Male   | 38 | 9/7/2018   | 6.92  | 9.6   | 5 | 4.5 | 120000 |
| 201905080039     | Male   | 61 | 8/5/2019   | 4.67  | 13.7  | 5 | 4.5 | 120000 |
| KGH-201501290079 | Female | 71 | 16-08-2018 | 1.63  | 33.1  | 3 | 4.5 | 246000 |
| 201603190033     | Female | 59 | 15-12-2018 | 0.51  | 131.4 | 1 | 4.5 | 357000 |
| 201812170039     | Male   | 22 | 17-12-2018 | 0.77  | 134.5 | 1 | 4.5 | 268000 |
| 201807290032     | Male   | 34 | 31-08-2018 | 2.86  | 27.1  | 4 | 4.6 | 282000 |
| 201811270023     | Male   | 63 | 27-11-2018 | 1.29  | 59.9  | 3 | 4.6 | 244000 |
| 201904300025     | Male   | 30 | 25-05-2019 | 9.79  | 6.7   | 5 | 4.7 | 157000 |
| 201808140022     | Male   | 57 | 21-11-2019 | 7.14  | 8.5   | 5 | 4.7 | 216000 |
| KGH-201503020012 | Male   | 27 | 5/12/2018  | 8.1   | 8.5   | 5 | 4.7 | 220000 |
| 201907290007     | Male   | 32 | 21-10-2019 | 7.73  | 8.7   | 5 | 4.7 | 167000 |
| 201810260080     | Male   | 56 | 26-10-2018 | 5.49  | 11.5  | 5 | 4.7 | 360000 |
| 201810120078     | Male   | 30 | 3/12/2018  | 5.81  | 12.3  | 5 | 4.7 | 337000 |
| 201911120059     | Male   | 53 | 12/11/2019 | 3.57  | 19.2  | 4 | 4.7 | 419000 |
| 201907200038     | Male   | 63 | 20-07-2019 | 3.13  | 21.5  | 4 | 4.7 | 337000 |
| 200003160036     | Male   | 85 | 3/1/2019   | 1.52  | 46.6  | 3 | 4.7 | 167000 |
| 201806210002     | Female | 40 | 21-06-2018 | 0.45  | 164.3 | 1 | 4.7 | 279000 |
| 201806290051     | Male   | 36 | 18-06-2019 | 10.39 | 6     | 5 | 4.8 | 160000 |
| KGH-201512290069 | Female | 49 | 21-08-2018 | 6.33  | 7.5   | 5 | 4.8 | 219000 |
| 201801170072     | Male   | 34 | 17-01-2018 | 7.51  | 8.9   | 5 | 4.8 | 538000 |
| 201903260042     | Male   | 36 | 9/7/2019   | 6.55  | 10.3  | 5 | 4.8 | 249000 |
| 200112250116     | Male   | 36 | 9/3/2018   | 5.64  | 12.2  | 5 | 4.8 | 223000 |
| 201904080052     | Female | 54 | 8/4/2019   | 2.18  | 25    | 4 | 4.8 | 305000 |
| 201305130058     | Male   | 48 | 5/5/2018   | 1.24  | 66.2  | 2 | 4.8 | 201000 |

|                  |        |    |            |       |       |   |     |        |
|------------------|--------|----|------------|-------|-------|---|-----|--------|
| 201305130058     | Male   | 48 | 5/5/2018   | 1.23  | 66.9  | 2 | 4.8 | 201000 |
| 201803270094     | Female | 55 | 28-03-2018 | 0.86  | 72.9  | 2 | 4.8 | 373000 |
| 201706130058     | Male   | 67 | 12/4/2018  | 0.75  | 110.6 | 1 | 4.8 | 166000 |
| 201609140092     | Female | 66 | 2/5/2018   | 0.38  | 180.4 | 1 | 4.8 | 353000 |
| 201812240052     | Male   | 54 | 24-12-2018 | 7.98  | 7.5   | 5 | 4.9 | 294000 |
| KGH-201504150058 | Male   | 59 | 16-01-2018 | 7.51  | 7.9   | 5 | 4.9 | 180000 |
| 201704240141     | Male   | 38 | 15-11-2019 | 7.79  | 8.3   | 5 | 4.9 | 328000 |
| 201806290051     | Male   | 36 | 29-06-2018 | 7.71  | 8.5   | 5 | 4.9 | 185000 |
| 201903300054     | Female | 24 | 10/4/2019  | 6.3   | 8.7   | 5 | 4.9 | 246000 |
| 201808300015     | Male   | 52 | 30-08-2018 | 6.08  | 10.4  | 5 | 4.9 | 282000 |
| 201807190004     | Male   | 67 | 19-07-2018 | 3.65  | 17.8  | 4 | 4.9 | 251000 |
| KGH-201504110120 | Female | 47 | 6/3/2018   | 0.98  | 64.8  | 2 | 4.9 | 340000 |
| 201806040130     | Male   | 82 | 4/6/2018   | 1.06  | 71.2  | 2 | 4.9 | 247000 |
| 201805110028     | Female | 40 | 11/5/2018  | 0.53  | 136   | 1 | 4.9 | 273000 |
| 201606270082     | Male   | 39 | 2/3/2019   | 12.19 | 4.9   | 5 | 5   | 242000 |
| 201806090089     | Male   | 33 | 12/9/2018  | 9.14  | 7.1   | 5 | 5   | 187000 |
| 201903260079     | Female | 26 | 18-07-2019 | 7.24  | 7.3   | 5 | 5   | 502000 |
| 201812100100     | Female | 67 | 10/12/2018 | 5.82  | 7.7   | 5 | 5   | 169000 |
| 201808020013     | Male   | 33 | 2/8/2018   | 8.09  | 8.2   | 5 | 5   | 321000 |
| 201810240067     | Male   | 44 | 24-10-2018 | 5.66  | 11.7  | 5 | 5   | 228000 |
| 201805140011     | Male   | 62 | 14-05-2018 | 5.24  | 11.9  | 5 | 5   | 324000 |
| 201410190048     | Female | 68 | 1/7/2019   | 3     | 16.5  | 4 | 5   | 293000 |
| 201906110020     | Male   | 63 | 11/6/2019  | 2.71  | 25.4  | 4 | 5   | 223000 |
| KGH-201506100030 | Male   | 53 | 1/4/2019   | 2.31  | 31.7  | 3 | 5   | 191000 |
| 201811210111     | Male   | 53 | 28-11-2018 | 1.91  | 39.4  | 3 | 5   | 289000 |
| 201912270070     | Male   | 58 | 27-12-2019 | 1.22  | 64.9  | 2 | 5   | 238000 |
| 201901230042     | Female | 54 | 29-05-2019 | 0.69  | 94.4  | 1 | 5   | 282000 |
| 201905220041     | Male   | 31 | 28-05-2019 | 9.52  | 6.9   | 5 | 5.1 | 229000 |
| 201911050078     | Female | 55 | 5/11/2019  | 3.82  | 13.1  | 5 | 5.1 | 447000 |
| 201904030041     | Male   | 60 | 3/4/2019   | 4.17  | 15.6  | 4 | 5.1 | 221000 |
| 201012110053     | Female | 67 | 15-03-2019 | 0.96  | 61.7  | 2 | 5.1 | 354000 |
| 201002060102     | Male   | 51 | 5/7/2018   | 1.16  | 70.7  | 2 | 5.1 | 298000 |
| KGH-201503060017 | Male   | 63 | 24-12-2019 | 1.04  | 76.8  | 2 | 5.1 | 183000 |
| 201009300035     | Male   | 51 | 9/1/2018   | 0.98  | 85.8  | 2 | 5.1 | 239000 |
| 201806290047     | Male   | 68 | 5/10/2018  | 0.78  | 105.4 | 1 | 5.1 | 339000 |
| 201910020100     | Male   | 46 | 19-11-2019 | 0.71  | 127.2 | 1 | 5.1 | 220000 |
| 201911110111     | Male   | 22 | 11/11/2019 | 0.8   | 128.7 | 1 | 5.1 | 210000 |
| 201806110006     | Male   | 29 | 11/6/2018  | 12.32 | 5.2   | 5 | 5.2 | 162000 |
| 201911180004     | Male   | 53 | 29-11-2019 | 8.67  | 6.9   | 5 | 5.2 | 170000 |
| 201807060050     | Male   | 31 | 19-09-2018 | 8.55  | 7.8   | 5 | 5.2 | 115000 |
| 201912060088     | Male   | 46 | 6/12/2019  | 5.11  | 13    | 5 | 5.2 | 283000 |

|              |        |    |            |       |       |   |     |        |
|--------------|--------|----|------------|-------|-------|---|-----|--------|
| 201907020065 | Male   | 56 | 2/7/2019   | 3.23  | 21.3  | 4 | 5.2 | 302000 |
| 201802060058 | Male   | 63 | 6/2/2018   | 1.62  | 46    | 3 | 5.2 | 257000 |
| 201904060047 | Male   | 63 | 6/4/2019   | 1.37  | 55.9  | 3 | 5.2 | 226000 |
| 201903140048 | Male   | 35 | 14-03-2019 | 1.22  | 72    | 2 | 5.2 | 301000 |
| 201910140051 | Female | 42 | 14-10-2019 | 0.67  | 102.8 | 1 | 5.2 | 178000 |
| 201806010083 | Male   | 28 | 3/6/2018   | 0.71  | 140.6 | 1 | 5.2 | 308000 |
| 201605210027 | Female | 46 | 4/1/2018   | 8.58  | 5.3   | 5 | 5.3 | 181000 |
| 201802090039 | Male   | 56 | 9/2/2018   | 9.75  | 5.9   | 5 | 5.3 | 178000 |
| 201805220100 | Female | 31 | 18-06-2019 | 0.99  | 69.6  | 2 | 5.3 | 257000 |
| 201908300036 | Female | 22 | 30-08-2019 | 0.88  | 85.5  | 2 | 5.3 | 354000 |
| 201802060095 | Female | 58 | 10/4/2019  | 9.5   | 4.5   | 5 | 5.4 | 345000 |
| 201812290076 | Male   | 33 | 7/8/2019   | 10.9  | 5.8   | 5 | 5.4 | 156000 |
| 201011250056 | Female | 72 | 27-06-2018 | 7.2   | 5.9   | 5 | 5.4 | 294000 |
| 201704100054 | Female | 30 | 16-05-2018 | 7.76  | 6.5   | 5 | 5.4 | 204000 |
| 201612190031 | Male   | 63 | 1/7/2019   | 8.57  | 6.7   | 5 | 5.4 | 227000 |
| 201605020041 | Female | 59 | 21-04-2018 | 6.35  | 7.2   | 5 | 5.4 | 223000 |
| 201805070053 | Male   | 62 | 7/5/2018   | 6.79  | 8.8   | 5 | 5.4 | 335000 |
| 201607010057 | Male   | 27 | 15-08-2018 | 6.13  | 11.8  | 5 | 5.4 | 273000 |
| 201911220024 | Female | 67 | 22-11-2019 | 3.54  | 13.7  | 5 | 5.4 | 262000 |
| 201111280184 | Female | 57 | 27-11-2018 | 2.98  | 17.3  | 4 | 5.4 | 221000 |
| 200711200031 | Male   | 36 | 8/11/2018  | 1.26  | 68.9  | 2 | 5.4 | 300000 |
| 201703040106 | Male   | 53 | 7/11/2018  | 1.01  | 82.3  | 2 | 5.4 | 406000 |
| 201808170022 | Female | 50 | 17-08-2018 | 0.71  | 92.8  | 1 | 5.4 | 372000 |
| 201806010015 | Male   | 60 | 1/6/2018   | 0.89  | 92.8  | 1 | 5.4 | 288000 |
| 201903130004 | Male   | 29 | 13-03-2019 | 13.49 | 4.7   | 5 | 5.5 | 186000 |
| 201902250007 | Male   | 30 | 14-03-2019 | 10.4  | 6.3   | 5 | 5.5 | 160000 |
| 201707170228 | Male   | 57 | 22-11-2018 | 9.03  | 6.5   | 5 | 5.5 | 265000 |
| 200704090068 | Male   | 34 | 19-11-2018 | 8.69  | 7.5   | 5 | 5.5 | 195000 |
| 200806130074 | Male   | 45 | 17-09-2018 | 5.5   | 12    | 5 | 5.5 | 202000 |
| 201912280061 | Male   | 45 | 28-12-2019 | 5.39  | 12.3  | 5 | 5.5 | 181000 |
| 201809200037 | Male   | 48 | 20-09-2018 | 4.47  | 15.1  | 4 | 5.5 | 221000 |
| 201803200098 | Male   | 36 | 20-03-2018 | 4.53  | 15.7  | 4 | 5.5 | 207000 |
| 201806260060 | Female | 62 | 26-06-2018 | 2.18  | 24.3  | 4 | 5.5 | 360000 |
| 201609090044 | Male   | 87 | 14-04-2018 | 1.87  | 36.5  | 3 | 5.5 | 184000 |
| 201805130024 | Male   | 67 | 18-09-2019 | 1.5   | 49.7  | 3 | 5.5 | 306000 |
| 201405260003 | Male   | 49 | 11/10/2019 | 1.41  | 56.9  | 3 | 5.5 | 202000 |
| 201802230041 | Female | 75 | 23-02-2018 | 0.65  | 94.6  | 1 | 5.5 | 366000 |
| 201805100013 | Male   | 78 | 10/5/2018  | 0.83  | 95.4  | 1 | 5.5 | 188000 |
| 201801220097 | Male   | 50 | 2/4/2018   | 8.34  | 7.3   | 5 | 5.6 | 221000 |
| 201804250039 | Female | 55 | 25-04-2018 | 5.62  | 8.4   | 5 | 5.6 | 341000 |
| 201812260120 | Male   | 69 | 26-12-2018 | 2.03  | 34.8  | 3 | 5.6 | 268000 |
| 201903150090 | Male   | 47 | 15-03-2019 | 2.1   | 36.2  | 3 | 5.6 | 165000 |
| 201903270065 | Male   | 45 | 27-03-2019 | 1.66  | 47.9  | 3 | 5.6 | 360000 |
| 201906210079 | Male   | 81 | 27-06-2019 | 1.35  | 54    | 3 | 5.6 | 361000 |
| 201808180003 | Male   | 63 | 27-08-2018 | 1.2   | 65.1  | 2 | 5.6 | 413000 |

|                  |        |    |            |      |       |   |     |        |
|------------------|--------|----|------------|------|-------|---|-----|--------|
| KGH-201509180054 | Female | 51 | 30-05-2018 | 0.92 | 68.5  | 2 | 5.6 | 270000 |
| 201807060044     | Male   | 43 | 3/1/2019   | 1.18 | 71.7  | 2 | 5.6 | 301000 |
| 201009300035     | Male   | 52 | 17-01-2019 | 0.97 | 86.5  | 2 | 5.6 | 221000 |
| 201605020127     | Male   | 34 | 13-10-2018 | 0.71 | 135.2 | 1 | 5.6 | 419000 |
| 201804050025     | Male   | 45 | 5/4/2018   | 0.63 | 146.6 | 1 | 5.6 | 229000 |
| 201906070090     | Male   | 41 | 19-11-2019 | 7.65 | 8.4   | 5 | 5.7 | 235000 |
| 201904150229     | Male   | 46 | 13-12-2019 | 7.45 | 8.4   | 5 | 5.7 | 170000 |
| 201812100005     | Male   | 65 | 10/12/2018 | 3.95 | 16.4  | 4 | 5.7 | 256000 |
| 201804030063     | Male   | 65 | 17-04-2018 | 3.72 | 17.5  | 4 | 5.7 | 216000 |
| 201012100062     | Male   | 67 | 19-02-2019 | 2.42 | 28.6  | 4 | 5.7 | 256000 |
| 201801300072     | Male   | 39 | 30-01-2018 | 1.02 | 86.6  | 2 | 5.7 | 260000 |
| 201703310074     | Female | 43 | 30-03-2019 | 0.61 | 114   | 1 | 5.7 | 570000 |
| 201810050023     | Male   | 42 | 5/10/2018  | 0.66 | 140.9 | 1 | 5.7 | 208000 |
| 201704090016     | Male   | 61 | 10/5/2019  | 8.54 | 6.8   | 5 | 5.8 | 224000 |
| 201803010010     | Male   | 44 | 1/3/2018   | 8.68 | 7.1   | 5 | 5.8 | 231000 |
| 201812120018     | Male   | 30 | 19-12-2018 | 8.37 | 8     | 5 | 5.8 | 238000 |
| 201804030028     | Male   | 56 | 3/4/2018   | 2.34 | 30.9  | 3 | 5.8 | 255000 |
| 201811290039     | Female | 44 | 29-11-2018 | 1.84 | 31.7  | 3 | 5.8 | 288000 |
| 201012100062     | Male   | 66 | 10/9/2018  | 2.19 | 32.2  | 3 | 5.8 | 194000 |
| 200712270071     | Male   | 86 | 11/10/2019 | 1.51 | 46.9  | 3 | 5.8 | 184000 |
| 201307040041     | Female | 34 | 3/4/2018   | 0.63 | 115.2 | 1 | 5.8 | 352000 |
| 200504190008     | Male   | 36 | 25-08-2018 | 0.67 | 142.9 | 1 | 5.8 | 215000 |
| 201905100074     | Female | 40 | 10/5/2019  | 8.3  | 5.7   | 5 | 5.9 | 243000 |
| 201807200016     | Male   | 39 | 6/8/2018   | 9.75 | 6.4   | 5 | 5.9 | 409000 |
| 201805170069     | Male   | 40 | 1/6/2018   | 8.56 | 7.4   | 5 | 5.9 | 215000 |
| 201912050042     | Male   | 40 | 12/12/2019 | 8.15 | 7.8   | 5 | 5.9 | 223000 |
| 201911110009     | Male   | 50 | 11/11/2019 | 4.72 | 14    | 5 | 5.9 | 370000 |
| 201909100025     | Male   | 54 | 10/9/2019  | 2.65 | 26.9  | 4 | 5.9 | 209000 |
| 201801090119     | Female | 71 | 9/1/2018   | 1.88 | 28.1  | 4 | 5.9 | 396000 |
| 201911020044     | Male   | 50 | 6/11/2019  | 1.53 | 51.5  | 3 | 5.9 | 400000 |
| 201901240030     | Female | 50 | 24-01-2019 | 1.11 | 55.4  | 3 | 5.9 | 375000 |
| 201905300043     | Male   | 42 | 30-05-2019 | 1.46 | 56.4  | 3 | 5.9 | 256000 |
| 201801230060     | Male   | 71 | 23-01-2018 | 1.17 | 65.4  | 2 | 5.9 | 339000 |
| 201709130030     | Male   | 64 | 12/10/2019 | 0.87 | 94    | 1 | 5.9 | 190000 |
| 201905080033     | Male   | 50 | 8/5/2019   | 0.76 | 115.6 | 1 | 5.9 | 254000 |
| 201706040014     | Male   | 39 | 31-12-2018 | 8.54 | 7.5   | 5 | 6   | 260000 |
| 201809050083     | Female | 40 | 5/9/2018   | 6.53 | 7.5   | 5 | 6   | 416000 |
| 201909040007     | Female | 29 | 4/9/2019   | 3.38 | 17.1  | 4 | 6   | 216000 |
| 201203080074     | Male   | 65 | 7/2/2019   | 2.68 | 25.6  | 4 | 6   | 197000 |
| 201809210071     | Male   | 62 | 21-09-2018 | 1.57 | 47.9  | 3 | 6   | 356000 |
| 200905190079     | Male   | 63 | 27-12-2018 | 1.46 | 51.9  | 3 | 6   | 357000 |
| 201909130052     | Male   | 55 | 13-09-2019 | 1.25 | 63.8  | 2 | 6   | 306000 |
| 201807230095     | Male   | 53 | 6/3/2019   | 1.21 | 66.8  | 2 | 6   | 284000 |
| 201805040061     | Male   | 25 | 7/5/2019   | 1.24 | 75.6  | 2 | 6   | 199000 |

|                      |        |    |            |       |       |   |     |        |
|----------------------|--------|----|------------|-------|-------|---|-----|--------|
| 201007120027         | Male   | 49 | 19-06-2018 | 1.1   | 75.7  | 2 | 6   | 277000 |
| 201706160051         | Female | 61 | 5/2/2019   | 0.78  | 79.9  | 2 | 6   | 269000 |
| 201906040013         | Male   | 43 | 18-06-2019 | 10.52 | 5.7   | 5 | 6.1 | 135000 |
| 201801300043         | Male   | 45 | 9/2/2018   | 8.72  | 7.1   | 5 | 6.1 | 181000 |
| 201809010072         | Male   | 53 | 1/9/2018   | 8.33  | 7.2   | 5 | 6.1 | 223000 |
| 201903280109         | Male   | 69 | 28-03-2019 | 7.91  | 7.3   | 5 | 6.1 | 372000 |
| 201807180004         | Male   | 49 | 18-07-2018 | 7.61  | 8.1   | 5 | 6.1 | 247000 |
| 201911110011         | Male   | 67 | 11/11/2019 | 4.32  | 14.7  | 5 | 6.1 | 454000 |
| 201811070080         | Male   | 54 | 17-12-2018 | 4.17  | 16    | 4 | 6.1 | 182000 |
| 201907250093         | Male   | 63 | 25-07-2019 | 2.75  | 25    | 4 | 6.1 | 366000 |
| 201904200002         | Male   | 49 | 20-04-2019 | 2.62  | 27.8  | 4 | 6.1 | 426000 |
| 201912120061         | Male   | 60 | 12/12/2019 | 2.33  | 30.6  | 3 | 6.1 | 220000 |
| 201807120060         | Male   | 65 | 12/7/2018  | 1.53  | 48.9  | 3 | 6.1 | 387000 |
| 201910120074         | Male   | 70 | 12/10/2019 | 1.22  | 62.5  | 2 | 6.1 | 204000 |
| 201205260069         | Female | 83 | 6/11/2019  | 0.72  | 82.4  | 2 | 6.1 | 257000 |
| 201805080079         | Female | 66 | 8/5/2018   | 7.8   | 5.5   | 5 | 6.2 | 287000 |
| 201903050080         | Female | 23 | 10/7/2019  | 8.61  | 6.1   | 5 | 6.2 | 189000 |
| 201612030027         | Male   | 35 | 6/8/2018   | 5.67  | 12.2  | 5 | 6.2 | 160000 |
| 201807050046         | Female | 49 | 5/7/2018   | 3.87  | 13.2  | 5 | 6.2 | 331000 |
| 201902150006         | Female | 54 | 15-02-2019 | 2.16  | 25.3  | 4 | 6.2 | 308000 |
| 201810150068         | Male   | 75 | 16-10-2018 | 2.13  | 32.4  | 3 | 6.2 | 248000 |
| 201801250037         | Male   | 23 | 25-01-2018 | 2.12  | 41.4  | 3 | 6.2 | 209000 |
| 201909190009         | Male   | 63 | 19-09-2019 | 1.42  | 53.6  | 3 | 6.2 | 227000 |
| 201904230064         | Male   | 60 | 30-05-2019 | 1.35  | 57.4  | 3 | 6.2 | 321000 |
| 201704080116         | Male   | 54 | 6/12/2018  | 1.08  | 75.9  | 2 | 6.2 | 472000 |
| 201806010074         | Male   | 34 | 2/4/2019   | 14.46 | 4.2   | 5 | 6.3 | 290000 |
| 201801220092         | Male   | 47 | 23-01-2018 | 9.05  | 6.7   | 5 | 6.3 | 375000 |
| 201802080022         | Male   | 33 | 8/2/2018   | 8.98  | 7.3   | 5 | 6.3 | 317000 |
| 201810010167         | Male   | 61 | 1/10/2018  | 7.6   | 7.8   | 5 | 6.3 | 216000 |
| 201704040046         | Female | 43 | 24-07-2019 | 5.79  | 8.5   | 5 | 6.3 | 287000 |
| 201905140024         | Male   | 39 | 14-06-2019 | 6.53  | 10.2  | 5 | 6.3 | 285000 |
| 201106300140         | Male   | 63 | 8/8/2019   | 3.28  | 20.4  | 4 | 6.3 | 192000 |
| 201910290016         | Male   | 70 | 29-10-2019 | 2.91  | 22.9  | 4 | 6.3 | 236000 |
| 201902080014         | Female | 64 | 8/2/2019   | 2.09  | 25.4  | 4 | 6.3 | 326000 |
| 201807180073         | Male   | 66 | 18-07-2018 | 2.61  | 26.3  | 4 | 6.3 | 366000 |
| 201005270073         | Male   | 41 | 6/12/2019  | 2.77  | 27.1  | 4 | 6.3 | 299000 |
| 200611300023         | Male   | 55 | 4/3/2019   | 1.64  | 46.7  | 3 | 6.3 | 207000 |
| 201712230114         | Female | 49 | 11/12/2018 | 1.11  | 55.6  | 3 | 6.3 | 194000 |
| KGH-<br>201506170085 | Male   | 58 | 7/3/2019   | 1.31  | 59.8  | 3 | 6.3 | 204000 |
| 201810230056         | Male   | 69 | 23-10-2018 | 1.24  | 61.5  | 2 | 6.3 | 254000 |
| 201806260058         | Male   | 60 | 26-06-2018 | 1.16  | 68.4  | 2 | 6.3 | 281000 |
| 201802270048         | Female | 52 | 27-02-2018 | 0.85  | 74.8  | 2 | 6.3 | 216000 |
| 201901040069         | Male   | 65 | 4/1/2019   | 0.87  | 93.8  | 1 | 6.3 | 291000 |
| 201611110107         | Male   | 18 | 17-02-2018 | 0.84  | 126.7 | 1 | 6.3 | 213000 |

|                      |        |    |            |       |       |   |     |        |
|----------------------|--------|----|------------|-------|-------|---|-----|--------|
| 201804130043         | Male   | 37 | 16-05-2018 | 12.26 | 5     | 5 | 6.4 | 223000 |
| 201805220078         | Female | 65 | 13-08-2018 | 5.93  | 7.6   | 5 | 6.4 | 222000 |
| 201808010004         | Male   | 63 | 1/8/2018   | 6.39  | 9.4   | 5 | 6.4 | 153000 |
| 201811230015         | Male   | 44 | 23-11-2018 | 5.42  | 12.3  | 5 | 6.4 | 257000 |
| 201806270072         | Male   | 61 | 5/11/2019  | 2.96  | 23.1  | 4 | 6.4 | 333000 |
| 201803280058         | Male   | 70 | 29-03-2018 | 2.78  | 24.2  | 4 | 6.4 | 234000 |
| 201806290054         | Female | 45 | 29-06-2018 | 1.75  | 33.5  | 3 | 6.4 | 262000 |
| 201806270072         | Male   | 60 | 27-06-2018 | 1.87  | 39.4  | 3 | 6.4 | 275000 |
| 201803030018         | Male   | 60 | 3/3/2018   | 1.86  | 39.6  | 3 | 6.4 | 299000 |
| 201008090116         | Male   | 66 | 3/6/2019   | 0.83  | 98.7  | 1 | 6.4 | 235000 |
| 201811260079         | Male   | 65 | 26-11-2018 | 9.71  | 5.8   | 5 | 6.5 | 254000 |
| 201308050036         | Female | 66 | 20-04-2018 | 3.87  | 12.4  | 5 | 6.5 | 181000 |
| 201910300094         | Male   | 82 | 30-10-2019 | 1.18  | 62.9  | 2 | 6.5 | 382000 |
| 201309010040         | Female | 39 | 9/5/2019   | 0.75  | 91.6  | 1 | 6.5 | 287000 |
| 201801190014         | Male   | 40 | 19-01-2018 | 0.81  | 112.4 | 1 | 6.5 | 183000 |
| KGH-<br>201503020141 | Male   | 61 | 16-11-2018 | 0.72  | 118.1 | 1 | 6.5 | 407000 |
| 201805090005         | Male   | 29 | 9/5/2018   | 0.82  | 118.3 | 1 | 6.5 | 210000 |
| 201809100018         | Female | 45 | 10/9/2018  | 0.58  | 119.7 | 1 | 6.5 | 407000 |
| 201906100028         | Female | 67 | 10/6/2019  | 10.11 | 4.1   | 5 | 6.6 | 272000 |
| 201912190031         | Female | 43 | 31-12-2019 | 8     | 5.8   | 5 | 6.6 | 224000 |
| 201810080032         | Male   | 60 | 8/10/2018  | 7.98  | 7.4   | 5 | 6.6 | 182000 |
| 201805050061         | Male   | 55 | 30-07-2018 | 7.35  | 8.3   | 5 | 6.6 | 288000 |
| 201905020046         | Male   | 47 | 4/5/2019   | 6.83  | 9.3   | 5 | 6.6 | 242000 |
| 201901120106         | Male   | 49 | 15-01-2019 | 5.5   | 11.8  | 5 | 6.6 | 163000 |
| 201910110045         | Male   | 65 | 11/10/2019 | 4.04  | 15.9  | 4 | 6.6 | 225000 |
| 201407080002         | Male   | 62 | 14-11-2018 | 2.4   | 29.3  | 4 | 6.6 | 200000 |
| 201709140003         | Male   | 59 | 3/1/2018   | 1.61  | 47    | 3 | 6.6 | 173000 |
| 201912120007         | Male   | 75 | 12/12/2019 | 1.41  | 52.2  | 3 | 6.6 | 185000 |
| 201007120115         | Male   | 72 | 29-12-2018 | 1.2   | 63.4  | 2 | 6.6 | 249000 |
| 201912050041         | Male   | 32 | 6/12/2019  | 1.04  | 88.1  | 2 | 6.6 | 238000 |
| 201803080050         | Male   | 52 | 17-05-2019 | 0.84  | 102.2 | 1 | 6.6 | 339000 |
| 201910140071         | Male   | 30 | 14-10-2019 | 0.75  | 130.2 | 1 | 6.6 | 291000 |
| 201808140039         | Male   | 34 | 14-08-2018 | 11.86 | 5.2   | 5 | 6.7 | 192000 |
| 201903250006         | Male   | 18 | 24-06-2019 | 11.12 | 6.4   | 5 | 6.7 | 171000 |
| 201705260025         | Male   | 63 | 8/2/2019   | 8.79  | 6.5   | 5 | 6.7 | 245000 |
| 201903260079         | Female | 26 | 26-03-2019 | 6.03  | 9     | 5 | 6.7 | 226000 |
| 201807230050         | Female | 58 | 23-07-2018 | 4.57  | 10.5  | 5 | 6.7 | 563000 |
| 201809140046         | Male   | 83 | 14-09-2018 | 1.54  | 46.2  | 3 | 6.7 | 276000 |
| 201711270026         | Male   | 66 | 4/11/2019  | 0.78  | 106   | 1 | 6.7 | 206000 |
| 201911180175         | Female | 24 | 19-11-2019 | 0.7   | 109.4 | 1 | 6.7 | 290000 |
| 201802270007         | Male   | 42 | 27-02-2018 | 9.82  | 6.2   | 5 | 6.8 | 328000 |
| 201808290074         | Male   | 42 | 28-05-2019 | 8.49  | 7.4   | 5 | 6.8 | 165000 |
| 201802090018         | Male   | 47 | 9/2/2018   | 8.21  | 7.5   | 5 | 6.8 | 212000 |
| 201806070119         | Male   | 45 | 7/6/2018   | 7.79  | 8     | 5 | 6.8 | 210000 |

|                      |        |    |            |       |       |   |     |        |
|----------------------|--------|----|------------|-------|-------|---|-----|--------|
| 201903150006         | Male   | 35 | 15-03-2019 | 7.95  | 8.3   | 5 | 6.8 | 172000 |
| 201811100044         | Female | 28 | 10/11/2018 | 2.11  | 29.7  | 4 | 6.8 | 327000 |
| 201902250079         | Male   | 77 | 25-02-2019 | 2.07  | 33.3  | 3 | 6.8 | 256000 |
| 201909160003         | Male   | 44 | 16-09-2019 | 2.08  | 37.1  | 3 | 6.8 | 247000 |
| 201801050096         | Male   | 37 | 25-06-2018 | 1.64  | 50.6  | 3 | 6.8 | 216000 |
| 200104300002         | Male   | 62 | 20-09-2018 | 1.35  | 57    | 3 | 6.8 | 191000 |
| 201912310076         | Female | 71 | 31-12-2019 | 1.01  | 57.5  | 3 | 6.8 | 301000 |
| 201805020021         | Male   | 42 | 2/5/2018   | 1.23  | 68.7  | 2 | 6.8 | 210000 |
| 201909070062         | Male   | 46 | 7/9/2019   | 1.21  | 68.7  | 2 | 6.8 | 339000 |
| 201710050132         | Male   | 35 | 30-07-2018 | 1     | 90.5  | 1 | 6.8 | 249000 |
| 201911120051         | Male   | 54 | 12/11/2019 | 10.41 | 5.6   | 5 | 6.9 | 217000 |
| 201802170048         | Male   | 40 | 17-02-2018 | 8.94  | 7     | 5 | 6.9 | 251000 |
| 201902180046         | Female | 32 | 18-02-2019 | 5.47  | 9.6   | 5 | 6.9 | 252000 |
| 201906120003         | Male   | 48 | 12/6/2019  | 2.41  | 30.8  | 3 | 6.9 | 289000 |
| 201409020093         | Male   | 58 | 23-03-2018 | 2.24  | 32.2  | 3 | 6.9 | 226000 |
| 201901030050         | Female | 47 | 3/1/2019   | 1.37  | 44    | 3 | 6.9 | 360000 |
| 201909200068         | Female | 60 | 20-09-2019 | 1.13  | 52.3  | 3 | 6.9 | 294000 |
| 201002170013         | Male   | 28 | 13-02-2019 | 0.65  | 155.7 | 1 | 6.9 | 424000 |
| 201802150034         | Male   | 25 | 15-02-2018 | 16.45 | 3.8   | 5 | 7   | 190000 |
| 201911280037         | Male   | 34 | 16-12-2019 | 12.98 | 4.7   | 5 | 7   | 181000 |
| 201903160004         | Female | 31 | 16-03-2019 | 8.54  | 5.8   | 5 | 7   | 168000 |
| 201907250057         | Male   | 48 | 25-07-2019 | 7.62  | 8.1   | 5 | 7   | 164000 |
| 201812200110         | Male   | 55 | 20-12-2018 | 5.62  | 11.3  | 5 | 7   | 105000 |
| 201902070010         | Male   | 22 | 1/3/2019   | 6.31  | 11.9  | 5 | 7   | 290000 |
| 201810110054         | Male   | 41 | 11/10/2018 | 1.59  | 51.3  | 3 | 7   | 285000 |
| 201006140015         | Male   | 37 | 5/11/2019  | 0.78  | 119.2 | 1 | 7   | 231000 |
| 201412110113         | Male   | 31 | 11/6/2018  | 8.4   | 8     | 5 | 7.1 | 210000 |
| 201803060058         | Male   | 48 | 6/3/2018   | 7.21  | 8.7   | 5 | 7.1 | 475000 |
| 201405260003         | Male   | 50 | 19-06-2018 | 6.78  | 9.2   | 5 | 7.1 | 294000 |
| 201909270084         | Female | 47 | 27-09-2019 | 3.2   | 16.5  | 4 | 7.1 | 340000 |
| 201701130051         | Male   | 43 | 16-08-2018 | 3.26  | 22.2  | 4 | 7.1 | 278000 |
| 201801020094         | Male   | 59 | 2/1/2018   | 2.51  | 28.2  | 4 | 7.1 | 222000 |
| 201812050003         | Male   | 43 | 5/12/2018  | 2.6   | 28.8  | 4 | 7.1 | 165000 |
| 201807020026         | Female | 60 | 2/7/2018   | 1.66  | 33.5  | 3 | 7.1 | 342000 |
| 201603010093         | Male   | 47 | 28-02-2019 | 1.56  | 51    | 3 | 7.1 | 418000 |
| KGH-<br>201501260091 | Male   | 69 | 28-09-2019 | 1.31  | 57.8  | 3 | 7.1 | 294000 |
| 201906080046         | Male   | 43 | 8/6/2019   | 1.19  | 71    | 2 | 7.1 | 345000 |
| 201907180002         | Male   | 22 | 30-07-2019 | 16.57 | 3.9   | 5 | 7.2 | 211000 |
| 201404280118         | Male   | 42 | 5/7/2018   | 11.95 | 5     | 5 | 7.2 | 194000 |
| 201906170073         | Male   | 74 | 17-06-2019 | 7.38  | 7.7   | 5 | 7.2 | 191000 |
| 201901080019         | Male   | 55 | 8/1/2019   | 2.94  | 23.8  | 4 | 7.2 | 277000 |
| 201912020079         | Female | 69 | 3/12/2019  | 1.78  | 30.1  | 3 | 7.2 | 337000 |
| 201306160063         | Male   | 60 | 21-03-2018 | 1.49  | 51.2  | 3 | 7.2 | 155000 |
| 201903120035         | Male   | 65 | 12/3/2019  | 1.19  | 65.3  | 2 | 7.2 | 256000 |

|              |        |    |            |       |       |   |     |        |
|--------------|--------|----|------------|-------|-------|---|-----|--------|
| 201903180135 | Male   | 57 | 18-03-2019 | 1.2   | 66.4  | 2 | 7.2 | 183000 |
| 201810290122 | Male   | 49 | 29-10-2018 | 1.01  | 83.6  | 2 | 7.2 | 231000 |
| 201806290091 | Male   | 57 | 29-06-2018 | 0.93  | 89.2  | 2 | 7.2 | 250000 |
| 201809030045 | Male   | 57 | 3/9/2018   | 0.93  | 89.2  | 2 | 7.2 | 292000 |
| 201904160041 | Male   | 30 | 16-04-2019 | 0.87  | 109.7 | 1 | 7.2 | 329000 |
| 201810300030 | Female | 36 | 30-10-2018 | 9.8   | 4.8   | 5 | 7.3 | 120000 |
| 201809040031 | Male   | 35 | 4/9/2018   | 12.01 | 5.1   | 5 | 7.3 | 170000 |
| 201902250137 | Male   | 42 | 7/3/2019   | 10.28 | 5.9   | 5 | 7.3 | 356000 |
| 201811210053 | Male   | 48 | 21-11-2018 | 5.05  | 13.1  | 5 | 7.3 | 382000 |
| 201904260097 | Male   | 50 | 26-04-2019 | 3.22  | 21.8  | 4 | 7.3 | 222000 |
| 201806120047 | Male   | 38 | 12/6/2018  | 0.8   | 115.2 | 1 | 7.3 | 325000 |
| 201907250121 | Male   | 49 | 25-07-2019 | 12.72 | 4.5   | 5 | 7.4 | 329000 |
| 201805010045 | Male   | 48 | 28-05-2018 | 10.04 | 5.9   | 5 | 7.4 | 254000 |
| 201905090004 | Male   | 56 | 9/5/2019   | 9.37  | 6.2   | 5 | 7.4 | 425000 |
| 201801090081 | Male   | 75 | 9/1/2018   | 4.04  | 15.5  | 4 | 7.4 | 237000 |
| 201804120075 | Male   | 64 | 12/4/2018  | 3.79  | 17.2  | 4 | 7.4 | 210000 |
| 201910230002 | Male   | 56 | 23-10-2019 | 2.83  | 24.8  | 4 | 7.4 | 196000 |
| 201805050019 | Male   | 55 | 5/5/2018   | 2.05  | 36.1  | 3 | 7.4 | 208000 |
| 201810190080 | Female | 24 | 19-10-2018 | 1.47  | 46.5  | 3 | 7.4 | 228000 |
| 201811130038 | Male   | 60 | 13-11-2018 | 1.59  | 47.5  | 3 | 7.4 | 285000 |
| 201808270049 | Male   | 48 | 27-08-2018 | 1.45  | 55.3  | 3 | 7.4 | 180000 |
| 201912270048 | Male   | 76 | 27-12-2019 | 1.15  | 65.8  | 2 | 7.4 | 265000 |
| 201002200132 | Male   | 63 | 13-12-2019 | 1.16  | 67.7  | 2 | 7.4 | 178000 |
| 201807090015 | Male   | 36 | 9/7/2018   | 1     | 90    | 2 | 7.4 | 257000 |
| 201806250006 | Male   | 52 | 25-06-2018 | 10.6  | 5.5   | 5 | 7.5 | 276000 |
| 201805110054 | Male   | 34 | 12/5/2018  | 8.1   | 8.1   | 5 | 7.5 | 186000 |
| 201801030011 | Female | 54 | 3/1/2018   | 4.66  | 10.4  | 5 | 7.5 | 379000 |
| 201912050046 | Male   | 34 | 5/12/2019  | 3.09  | 24.8  | 4 | 7.5 | 295000 |
| 201612200122 | Male   | 62 | 7/3/2019   | 1.96  | 37.1  | 3 | 7.5 | 152000 |
| 201908310048 | Male   | 35 | 31-08-2019 | 1.14  | 77.8  | 2 | 7.5 | 266000 |
| 201805290035 | Male   | 65 | 29-05-2018 | 0.77  | 107.9 | 1 | 7.5 | 256000 |
| 201902110062 | Male   | 50 | 11/2/2019  | 0.61  | 149   | 1 | 7.5 | 246000 |
| 201806290051 | Male   | 36 | 21-03-2019 | 22.18 | 2.5   | 5 | 7.6 | 150000 |
| 201808200065 | Male   | 65 | 20-08-2018 | 9.19  | 6.2   | 5 | 7.6 | 428000 |
| 201912250012 | Male   | 22 | 25-12-2019 | 1.85  | 48.9  | 3 | 7.6 | 202000 |
| 201308210048 | Male   | 38 | 4/9/2018   | 1.5   | 55.8  | 3 | 7.6 | 368000 |
| 201907010190 | Male   | 63 | 10/7/2019  | 1.25  | 62.1  | 2 | 7.6 | 465000 |
| 201906050039 | Male   | 64 | 5/6/2019   | 0.94  | 86    | 2 | 7.6 | 191000 |
| 201207170037 | Male   | 38 | 8/3/2018   | 0.89  | 101.8 | 1 | 7.6 | 251000 |
| 201803050032 | Female | 51 | 5/3/2018   | 4.45  | 11.1  | 5 | 7.7 | 209000 |
| 201702060005 | Male   | 54 | 15-06-2018 | 2.8   | 25.3  | 4 | 7.7 | 159000 |
| 201805090072 | Male   | 27 | 9/5/2018   | 3     | 26.9  | 4 | 7.7 | 193000 |
| 201610270041 | Male   | 65 | 22-06-2018 | 1.38  | 55.1  | 3 | 7.7 | 294000 |
| 201804050046 | Male   | 70 | 5/4/2018   | 9.89  | 5.6   | 5 | 7.8 | 220000 |
| 201810080084 | Male   | 38 | 8/10/2018  | 9.79  | 6.4   | 5 | 7.8 | 226000 |

|                      |        |    |            |       |       |   |     |        |
|----------------------|--------|----|------------|-------|-------|---|-----|--------|
| 201802020030         | Female | 46 | 2/2/2018   | 6.03  | 8     | 5 | 7.8 | 332000 |
| 201802210042         | Male   | 52 | 21-02-2018 | 5.59  | 11.5  | 5 | 7.8 | 75000  |
| 200503240007         | Male   | 66 | 7/1/2019   | 0.94  | 85.5  | 2 | 7.8 | 244000 |
| 201803120087         | Male   | 40 | 12/3/2018  | 37.26 | 1.4   | 5 | 7.9 | 155000 |
| 201704240141         | Male   | 37 | 29-01-2019 | 10.87 | 5.7   | 5 | 7.9 | 375000 |
| 201812260077         | Male   | 56 | 26-12-2018 | 7.87  | 7.6   | 5 | 7.9 | 181000 |
| 201908240043         | Male   | 50 | 24-08-2019 | 3.46  | 20.1  | 4 | 7.9 | 260000 |
| 201803070005         | Male   | 44 | 7/3/2018   | 3.5   | 20.4  | 4 | 7.9 | 273000 |
| 201907120041         | Male   | 45 | 12/7/2019  | 12.3  | 4.8   | 5 | 8   | 165000 |
| 201902280022         | Male   | 54 | 31-05-2019 | 9.42  | 6.2   | 5 | 8   | 182000 |
| 201903230155         | Female | 60 | 23-03-2019 | 4.36  | 11    | 5 | 8   | 342000 |
| 201805310095         | Female | 50 | 24-11-2018 | 2.33  | 23.5  | 4 | 8   | 192000 |
| 201810240091         | Female | 73 | 24-10-2018 | 2.05  | 25.3  | 4 | 8   | 372000 |
| 201810020030         | Male   | 71 | 2/10/2018  | 1.4   | 53.2  | 3 | 8   | 151000 |
| 201903220095         | Female | 31 | 22-03-2019 | 6.47  | 8     | 5 | 8.1 | 160000 |
| 201704230016         | Male   | 62 | 31-01-2018 | 6.25  | 9.7   | 5 | 8.1 | 187000 |
| 201608290069         | Male   | 50 | 9/4/2018   | 5.02  | 13.1  | 5 | 8.1 | 215000 |
| KGH-<br>201501120046 | Female | 66 | 6/8/2018   | 2.43  | 21.2  | 4 | 8.1 | 171000 |
| 201909030098         | Male   | 42 | 3/9/2019   | 3.3   | 22    | 4 | 8.1 | 309000 |
| 201901020039         | Female | 33 | 2/1/2019   | 2.32  | 25.7  | 4 | 8.1 | 191000 |
| 201809030117         | Male   | 70 | 3/9/2018   | 2.59  | 26.2  | 4 | 8.1 | 278000 |
| 201806090023         | Male   | 63 | 9/6/2018   | 1.73  | 42.7  | 3 | 8.1 | 176000 |
| 201909140132         | Female | 34 | 21-09-2019 | 1.25  | 52.2  | 3 | 8.1 | 299000 |
| 201901170098         | Female | 43 | 17-01-2019 | 0.75  | 89.8  | 2 | 8.1 | 263000 |
| 201812040047         | Female | 40 | 4/12/2018  | 12.24 | 3.6   | 5 | 8.2 | 75000  |
| 201904230028         | Male   | 45 | 23-04-2019 | 9.44  | 6.4   | 5 | 8.2 | 187000 |
| 201810260042         | Male   | 68 | 26-10-2018 | 6.61  | 8.9   | 5 | 8.2 | 152000 |
| 201108220073         | Male   | 57 | 7/12/2018  | 6.6   | 9.3   | 5 | 8.2 | 205000 |
| 201802100114         | Male   | 33 | 19-07-2018 | 6.43  | 10.7  | 5 | 8.2 | 303000 |
| KGH-<br>201412170097 | Female | 42 | 17-07-2019 | 1.77  | 33.5  | 3 | 8.2 | 262000 |
| 201803170007         | Female | 63 | 3/5/2018   | 0.61  | 105.5 | 1 | 8.2 | 405000 |
| 201806010074         | Male   | 34 | 1/6/2018   | 12.34 | 5     | 5 | 8.3 | 258000 |
| 201904240030         | Male   | 44 | 11/9/2019  | 9.78  | 6.2   | 5 | 8.3 | 191000 |
| 201906150015         | Male   | 63 | 15-06-2019 | 8.01  | 7.3   | 5 | 8.3 | 271000 |
| KGH-<br>201412260009 | Male   | 57 | 8/1/2019   | 7.56  | 7.9   | 5 | 8.3 | 260000 |
| 201904090099         | Male   | 54 | 9/4/2019   | 4.52  | 14.5  | 5 | 8.3 | 321000 |
| 201212290052         | Male   | 65 | 1/1/2018   | 3.39  | 19.5  | 4 | 8.3 | 271000 |
| 199905280088         | Male   | 62 | 15-02-2018 | 2.52  | 27.7  | 4 | 8.3 | 268000 |
| 201411180136         | Male   | 73 | 15-05-2018 | 2.22  | 31.1  | 3 | 8.3 | 421000 |
| 201910290020         | Male   | 71 | 29-10-2019 | 1.69  | 42.8  | 3 | 8.3 | 194000 |
| 201809240047         | Female | 48 | 3/7/2019   | 1.17  | 52.6  | 3 | 8.3 | 267000 |
| 200812290221         | Male   | 71 | 3/4/2018   | 1.08  | 71.8  | 2 | 8.3 | 256000 |

|                  |        |    |            |       |      |   |     |        |
|------------------|--------|----|------------|-------|------|---|-----|--------|
| 201805240125     | Male   | 68 | 25-05-2018 | 0.98  | 81   | 2 | 8.3 | 237000 |
| 201911070096     | Male   | 73 | 7/11/2019  | 11.05 | 4.9  | 5 | 8.4 | 210000 |
| 201807020002     | Male   | 58 | 2/7/2018   | 5.28  | 12   | 5 | 8.4 | 412000 |
| 201804200046     | Female | 35 | 20-04-2018 | 2.7   | 21.3 | 4 | 8.4 | 420000 |
| 201812240120     | Male   | 62 | 24-12-2018 | 3.09  | 21.9 | 4 | 8.4 | 225000 |
| 201903160004     | Female | 31 | 31-05-2019 | 11.29 | 4.2  | 5 | 8.5 | 194000 |
| 201907010012     | Male   | 56 | 1/7/2019   | 4.47  | 14.6 | 5 | 8.5 | 194000 |
| 201909040069     | Male   | 48 | 4/9/2019   | 2.76  | 26.3 | 4 | 8.5 | 342000 |
| 201803010118     | Male   | 43 | 1/3/2018   | 2.37  | 32.1 | 3 | 8.5 | 303000 |
| 201811240051     | Male   | 54 | 24-11-2018 | 1.79  | 42.3 | 3 | 8.5 | 390000 |
| 201904290018     | Male   | 45 | 29-04-2019 | 24.39 | 2.2  | 5 | 8.6 | 203000 |
| 201808190012     | Male   | 63 | 20-08-2018 | 5.69  | 10.8 | 5 | 8.6 | 262000 |
| 201812040053     | Male   | 75 | 4/12/2018  | 5.26  | 11.4 | 5 | 8.6 | 374000 |
| KGH-201511020042 | Male   | 56 | 19-07-2019 | 4.12  | 16.1 | 4 | 8.6 | 167000 |
| KGH-201506260060 | Male   | 67 | 30-08-2018 | 3.97  | 16.2 | 4 | 8.6 | 264000 |
| 201808060058     | Male   | 63 | 6/8/2018   | 2.3   | 30.7 | 3 | 8.6 | 253000 |
| 201202260058     | Male   | 60 | 12/4/2019  | 2.2   | 32.7 | 3 | 8.6 | 233000 |
| 201006210015     | Male   | 74 | 27-08-2019 | 0.81  | 99.2 | 1 | 8.6 | 302000 |
| 201410270031     | Female | 30 | 4/1/2018   | 9.66  | 5.1  | 5 | 8.7 | 167000 |
| 201809030075     | Female | 33 | 3/9/2018   | 6.8   | 7.4  | 5 | 8.7 | 280000 |
| 201802210041     | Male   | 30 | 21-02-2018 | 4.5   | 16.5 | 4 | 8.7 | 252000 |
| 201910030153     | Male   | 60 | 3/10/2019  | 3.43  | 19.6 | 4 | 8.7 | 395000 |
| 201811090088     | Male   | 66 | 9/11/2018  | 1.7   | 43.1 | 3 | 8.7 | 150000 |
| 201809010052     | Male   | 51 | 1/9/2018   | 1.69  | 45.8 | 3 | 8.7 | 192000 |
| 201808070101     | Male   | 68 | 9/8/2018   | 1.59  | 46.3 | 3 | 8.7 | 280000 |
| KGH-201505310059 | Female | 49 | 1/8/2018   | 1.3   | 46.3 | 3 | 8.7 | 150000 |
| 200606060109     | Male   | 44 | 6/9/2018   | 1.25  | 66.8 | 2 | 8.7 | 208000 |
| 201911200111     | Male   | 47 | 20-11-2019 | 19.06 | 2.8  | 5 | 8.8 | 204000 |
| 201906210006     | Male   | 41 | 21-06-2019 | 4.65  | 14.9 | 5 | 8.8 | 209000 |
| 201205220022     | Male   | 63 | 17-04-2019 | 1.32  | 58.3 | 3 | 8.8 | 308000 |
| 201907120041     | Male   | 45 | 22-07-2019 | 13.51 | 4.3  | 5 | 8.9 | 172000 |
| 201803070076     | Male   | 45 | 7/3/2018   | 11.38 | 5.2  | 5 | 8.9 | 393000 |
| 201806190023     | Female | 44 | 19-06-2018 | 2.8   | 19.5 | 4 | 8.9 | 205000 |
| 201902250007     | Male   | 30 | 25-02-2019 | 18.06 | 3.3  | 5 | 9   | 227000 |
| 201903090015     | Male   | 43 | 9/3/2019   | 14.19 | 4.1  | 5 | 9   | 255000 |
| 201810290103     | Male   | 52 | 29-10-2018 | 1.09  | 75.6 | 2 | 9   | 269000 |
| 201801260154     | Male   | 42 | 26-01-2018 | 21.77 | 2.5  | 5 | 9.2 | 125000 |
| 200609110076     | Female | 39 | 9/2/2019   | 8.2   | 5.8  | 5 | 9.2 | 140000 |
| 201801080107     | Male   | 62 | 8/1/2018   | 8.48  | 6.8  | 5 | 9.2 | 157000 |
| 201906080048     | Female | 55 | 8/7/2019   | 6.36  | 7.2  | 5 | 9.2 | 159000 |
| 201801090002     | Male   | 50 | 9/1/2018   | 4.06  | 16.7 | 4 | 9.2 | 386000 |
| 201208170115     | Male   | 61 | 5/6/2018   | 3.78  | 17.4 | 4 | 9.2 | 320000 |

|                      |        |    |            |       |      |   |      |        |
|----------------------|--------|----|------------|-------|------|---|------|--------|
| 201907110017         | Male   | 61 | 11/7/2019  | 2.99  | 22.8 | 4 | 9.2  | 235000 |
| 201909300168         | Male   | 47 | 21-10-2019 | 1.43  | 56.4 | 3 | 9.2  | 217000 |
| 201905230071         | Male   | 36 | 23-05-2019 | 0.96  | 94.4 | 1 | 9.2  | 357000 |
| 201808030012         | Male   | 42 | 3/8/2018   | 26.15 | 2    | 5 | 9.3  | 202000 |
| 201809040032         | Male   | 48 | 4/9/2018   | 10.06 | 5.9  | 5 | 9.3  | 231000 |
| 201911110020         | Male   | 54 | 11/11/2019 | 7.15  | 8.6  | 5 | 9.4  | 368000 |
| 201911260058         | Male   | 36 | 26-11-2019 | 1.27  | 68.3 | 2 | 9.4  | 188000 |
| 201901240009         | Male   | 38 | 24-01-2019 | 12.85 | 4.7  | 5 | 9.5  | 208000 |
| 201908270047         | Male   | 27 | 27-08-2019 | 10.6  | 6.3  | 5 | 9.5  | 247000 |
| 201802220028         | Male   | 60 | 22-02-2018 | 6.91  | 8.7  | 5 | 9.5  | 193000 |
| 201908050018         | Male   | 29 | 5/8/2019   | 4.93  | 14.9 | 5 | 9.5  | 153000 |
| 201808070123         | Female | 47 | 7/8/2018   | 17.68 | 2.3  | 5 | 9.6  | 352000 |
| 201603140121         | Female | 43 | 12/9/2018  | 16.19 | 2.6  | 5 | 9.6  | 238000 |
| 200908280037         | Male   | 54 | 8/3/2019   | 11.77 | 4.8  | 5 | 9.6  | 438000 |
| 201804160056         | Male   | 65 | 16-04-2018 | 10.49 | 5.3  | 5 | 9.6  | 304000 |
| 201806290018         | Female | 28 | 14-09-2018 | 6.59  | 8    | 5 | 9.6  | 359000 |
| 201902180104         | Male   | 68 | 18-02-2019 | 5.15  | 11.9 | 5 | 9.6  | 262000 |
| 201809060046         | Male   | 54 | 6/9/2018   | 1.68  | 45.6 | 3 | 9.6  | 198000 |
| 201801050041         | Male   | 42 | 5/1/2018   | 1.19  | 71.4 | 2 | 9.7  | 254000 |
| 201901300036         | Male   | 34 | 30-01-2019 | 10.26 | 6.2  | 5 | 9.8  | 215000 |
| 201303050012         | Male   | 35 | 15-07-2019 | 8.96  | 7.2  | 5 | 9.9  | 219000 |
| 201804130021         | Female | 41 | 13-04-2018 | 4.7   | 10.9 | 5 | 9.9  | 297000 |
| KGH-<br>201506260060 | Male   | 68 | 13-07-2019 | 5.28  | 11.6 | 5 | 9.9  | 374000 |
| 201706220110         | Male   | 49 | 5/2/2018   | 5.28  | 12.4 | 5 | 9.9  | 120000 |
| 201902080043         | Male   | 60 | 8/2/2019   | 1.26  | 62.1 | 2 | 9.9  | 218000 |
| 201307160068         | Male   | 67 | 21-11-2018 | 10.77 | 5.1  | 5 | 10   | 172000 |
| 201005230020         | Male   | 59 | 12/9/2019  | 10.53 | 5.4  | 5 | 10   | 243000 |
| 201905060102         | Male   | 45 | 4/9/2019   | 8     | 7.8  | 5 | 10   | 297000 |
| 201904020070         | Male   | 64 | 2/4/2019   | 2.37  | 29.6 | 4 | 10.1 | 353000 |
| 201211130010         | Male   | 56 | 28-08-2019 | 2.02  | 36.6 | 3 | 10.1 | 230000 |
| 201809070158         | Female | 44 | 15-10-2018 | 13.72 | 3.1  | 5 | 10.2 | 282000 |
| 201810130118         | Male   | 60 | 13-10-2018 | 7.15  | 8.4  | 5 | 10.2 | 177000 |
| 201907260076         | Male   | 47 | 27-07-2019 | 2.06  | 37   | 3 | 10.2 | 293000 |
| 201909190043         | Male   | 65 | 19-09-2019 | 2.23  | 31.6 | 3 | 10.3 | 160000 |
| 201812110042         | Male   | 35 | 12/12/2018 | 18.63 | 3.1  | 5 | 10.5 | 237000 |
| 201803280096         | Male   | 58 | 28-03-2018 | 7.98  | 7.4  | 5 | 10.5 | 483000 |
| 201907100002         | Male   | 21 | 10/7/2019  | 18.4  | 3.5  | 5 | 10.6 | 456000 |
| 201911200060         | Female | 73 | 20-11-2019 | 2.7   | 18.4 | 4 | 10.6 | 331000 |
| 201604050153         | Male   | 58 | 22-01-2019 | 3.06  | 22.5 | 4 | 10.6 | 341000 |
| 201807300118         | Male   | 73 | 30-07-2018 | 7.46  | 7.7  | 5 | 10.7 | 340000 |
| 201812190054         | Male   | 63 | 19-12-2018 | 2.94  | 23.1 | 4 | 10.7 | 224000 |
| 201803220006         | Male   | 51 | 22-03-2018 | 2.42  | 30.2 | 3 | 10.7 | 320000 |
| 201411260038         | Female | 35 | 29-10-2018 | 13.43 | 3.4  | 5 | 10.8 | 201000 |
| 201804110036         | Male   | 66 | 11/4/2018  | 9.34  | 6    | 5 | 10.8 | 165000 |

|              |        |    |            |       |       |   |      |        |
|--------------|--------|----|------------|-------|-------|---|------|--------|
| 201805090039 | Male   | 23 | 9/5/2018   | 5.18  | 14.8  | 5 | 10.8 | 276000 |
| 201105110165 | Male   | 41 | 19-02-2019 | 3.9   | 18.2  | 4 | 10.8 | 262000 |
| 201804250038 | Female | 45 | 25-04-2018 | 4.06  | 12.7  | 5 | 10.9 | 294000 |
| 201903140041 | Male   | 70 | 14-03-2019 | 2.51  | 27.2  | 4 | 10.9 | 275000 |
| 201802070113 | Male   | 26 | 7/2/2018   | 21.45 | 2.8   | 5 | 11   | 190000 |
| 201705230088 | Male   | 60 | 1/11/2019  | 8.37  | 7     | 5 | 11   | 310000 |
| 201808080021 | Male   | 33 | 8/8/2018   | 7.61  | 8.8   | 5 | 11   | 492000 |
| 201712270034 | Female | 56 | 7/3/2018   | 1.47  | 39.1  | 3 | 11   | 245000 |
| 201805160051 | Male   | 60 | 16-05-2018 | 7.24  | 8.3   | 5 | 11.1 | 155000 |
| 201803290055 | Male   | 58 | 29-03-2018 | 1.94  | 38    | 3 | 11.2 | 503000 |
| 201910050146 | Male   | 50 | 5/10/2019  | 17.65 | 3.1   | 5 | 11.3 | 292000 |
| 201704270021 | Female | 67 | 10/10/2019 | 3.74  | 12.8  | 5 | 11.4 | 293000 |
| 201912050022 | Female | 65 | 5/12/2019  | 1.81  | 29.9  | 4 | 11.4 | 175000 |
| 201902220047 | Male   | 35 | 22-02-2019 | 1.58  | 53.4  | 3 | 11.4 | 80000  |
| 201812080079 | Female | 49 | 8/12/2018  | 3.83  | 13.3  | 5 | 11.5 | 352000 |
| 200205290053 | Male   | 66 | 18-01-2019 | 2.19  | 32.2  | 3 | 11.6 | 206000 |
| 201907180002 | Male   | 22 | 18-07-2019 | 11.53 | 5.9   | 5 | 12   | 225000 |
| 201807040048 | Female | 50 | 4/7/2018   | 4.74  | 10.4  | 5 | 12.2 | 325000 |
| 201603190028 | Male   | 76 | 10/10/2019 | 3.42  | 18.7  | 4 | 12.2 | 390000 |
| 201901220045 | Male   | 75 | 22-01-2019 | 6.36  | 9.2   | 5 | 12.3 | 205000 |
| 201903120070 | Female | 39 | 12/3/2019  | 8.4   | 5.6   | 5 | 12.5 | 284000 |
| 201010060059 | Female | 58 | 6/2/2019   | 3.07  | 16.6  | 4 | 12.6 | 158000 |
| 201906120102 | Male   | 34 | 17-06-2019 | 1.75  | 47.7  | 3 | 12.8 | 254000 |
| 201803060035 | Male   | 63 | 6/3/2018   | 0.65  | 132.1 | 1 | 12.9 | 200000 |
| 201911260052 | Female | 80 | 26-11-2019 | 4.22  | 10.8  | 5 | 14.1 | 252000 |
| 201909110055 | Male   | 63 | 11/9/2019  | 8.62  | 6.7   | 5 | 14.3 | 520000 |
| 201806060058 | Male   | 45 | 6/6/2018   | 23.18 | 2.3   | 5 | 14.9 | 156000 |
| 201806220067 | Male   | 33 | 23-06-2018 | 4.5   | 16.1  | 4 | 15.1 | 477000 |
